# Supplementary material
Source: HighWire-hosted journal article supplement (https://jnnp.bmj.com/content/92/9/932)
Supplement: inline-supplementary-material-4 [file inline-supplementary-material-4.pdf]

**Supplementary table 2: Comprehensive list of fields which were extracted from eligible studies**

(asterisk denotes variables for which outcome measures were collected)

| Data items                                          | Prevalences                | Mechanistic data             | Analytical statistics                              |
|-----------------------------------------------------|----------------------------|------------------------------|----------------------------------------------------|
| Title of study                                      | Headache                   | C-reactive protein           | Results from statistical tests reported by a study |
| CEBM Levels of Evidence                             | Myalgia                    | D-dimer                      |                                                    |
| Date of data collection                             | Asthenia                   | Antibodies                   |                                                    |
| Funding source                                      | Dizziness/ vertigo         | Cytokines                    |                                                    |
| Country of origin                                   | Tinnitus                   | Creatine kinase              |                                                    |
| Ethics statement                                    | Hearing impairment         | Computed tomography          |                                                    |
| Number of recruitment settings                      | Ataxia                     | Magnetic resonance imaging   |                                                    |
| Study design (including retrospective/ prospective) | Paresis                    | Electroencephalography       |                                                    |
| Number of infected participants                     | Obsessions                 | Cerebrospinal fluid analysis |                                                    |
| Number of control participants                      | Palsy                      | Post-mortem findings         |                                                    |
| Description of control group                        | Paraesthesia/numbness      |                              |                                                    |
| Population age (mean/median, sd/range)              | Speech/aphasia             |                              |                                                    |
| Population sex (number male)                        | Focal neurological deficit |                              |                                                    |
| Method of COVID-19 diagnosis                        | Seizures                   |                              |                                                    |
| Stage of COVID-19 pathway                           | Neuralgia                  |                              |                                                    |
| Severity of COVID-19                                | Ophthalmoplegia            |                              |                                                    |
| COVID-19 outcome                                    | Visual defect              |                              |                                                    |

|                                                                             |                                                 |  |  |
|-----------------------------------------------------------------------------|-------------------------------------------------|--|--|
| Follow-up period                                                            | Fatigue*                                        |  |  |
| Time-point in relation to infection                                         | Impaired smell*                                 |  |  |
| Treatments for neuropsych manifestations                                    | Impaired taste*                                 |  |  |
| Neuropsychiatric and other relevant comorbidities                           | Cognitive impairment*                           |  |  |
| Methodological limitations as noted by the authors                          | Depression*                                     |  |  |
| temporal onset of neuropsych complication (in relation to COVID-19 disease) | Anxiety*                                        |  |  |
| Method of ascertaining prevalence                                           | Post-traumatic stress disorder*                 |  |  |
| Nature of sample                                                            | Impaired consciousness/delirium/encephalopathy* |  |  |
|                                                                             | Stroke                                          |  |  |
|                                                                             | Meningoencephalitis                             |  |  |
|                                                                             | Guillain-Barre syndrome                         |  |  |
|                                                                             | Central demyelinating disorders                 |  |  |
|                                                                             | Motor neuropathy                                |  |  |
|                                                                             | Migraine                                        |  |  |
|                                                                             | Sleep disorder                                  |  |  |
|                                                                             | Catatonia                                       |  |  |
|                                                                             | Dementia                                        |  |  |
|                                                                             | Mania                                           |  |  |
|                                                                             | Functional neurological disorder                |  |  |
|                                                                             | Psychosis                                       |  |  |

|  |                                                       |  |  |
|--|-------------------------------------------------------|--|--|
|  | Post-intensive care unit neuropsychiatric abnormality |  |  |
|  | Myopathy                                              |  |  |
|  | Movement disorder                                     |  |  |
