# Supplementary material
Source: HighWire-hosted journal article supplement (https://jnnp.bmj.com/content/92/9/932)

## Proportion of patients reporting headache in SARS-CoV-2 infection

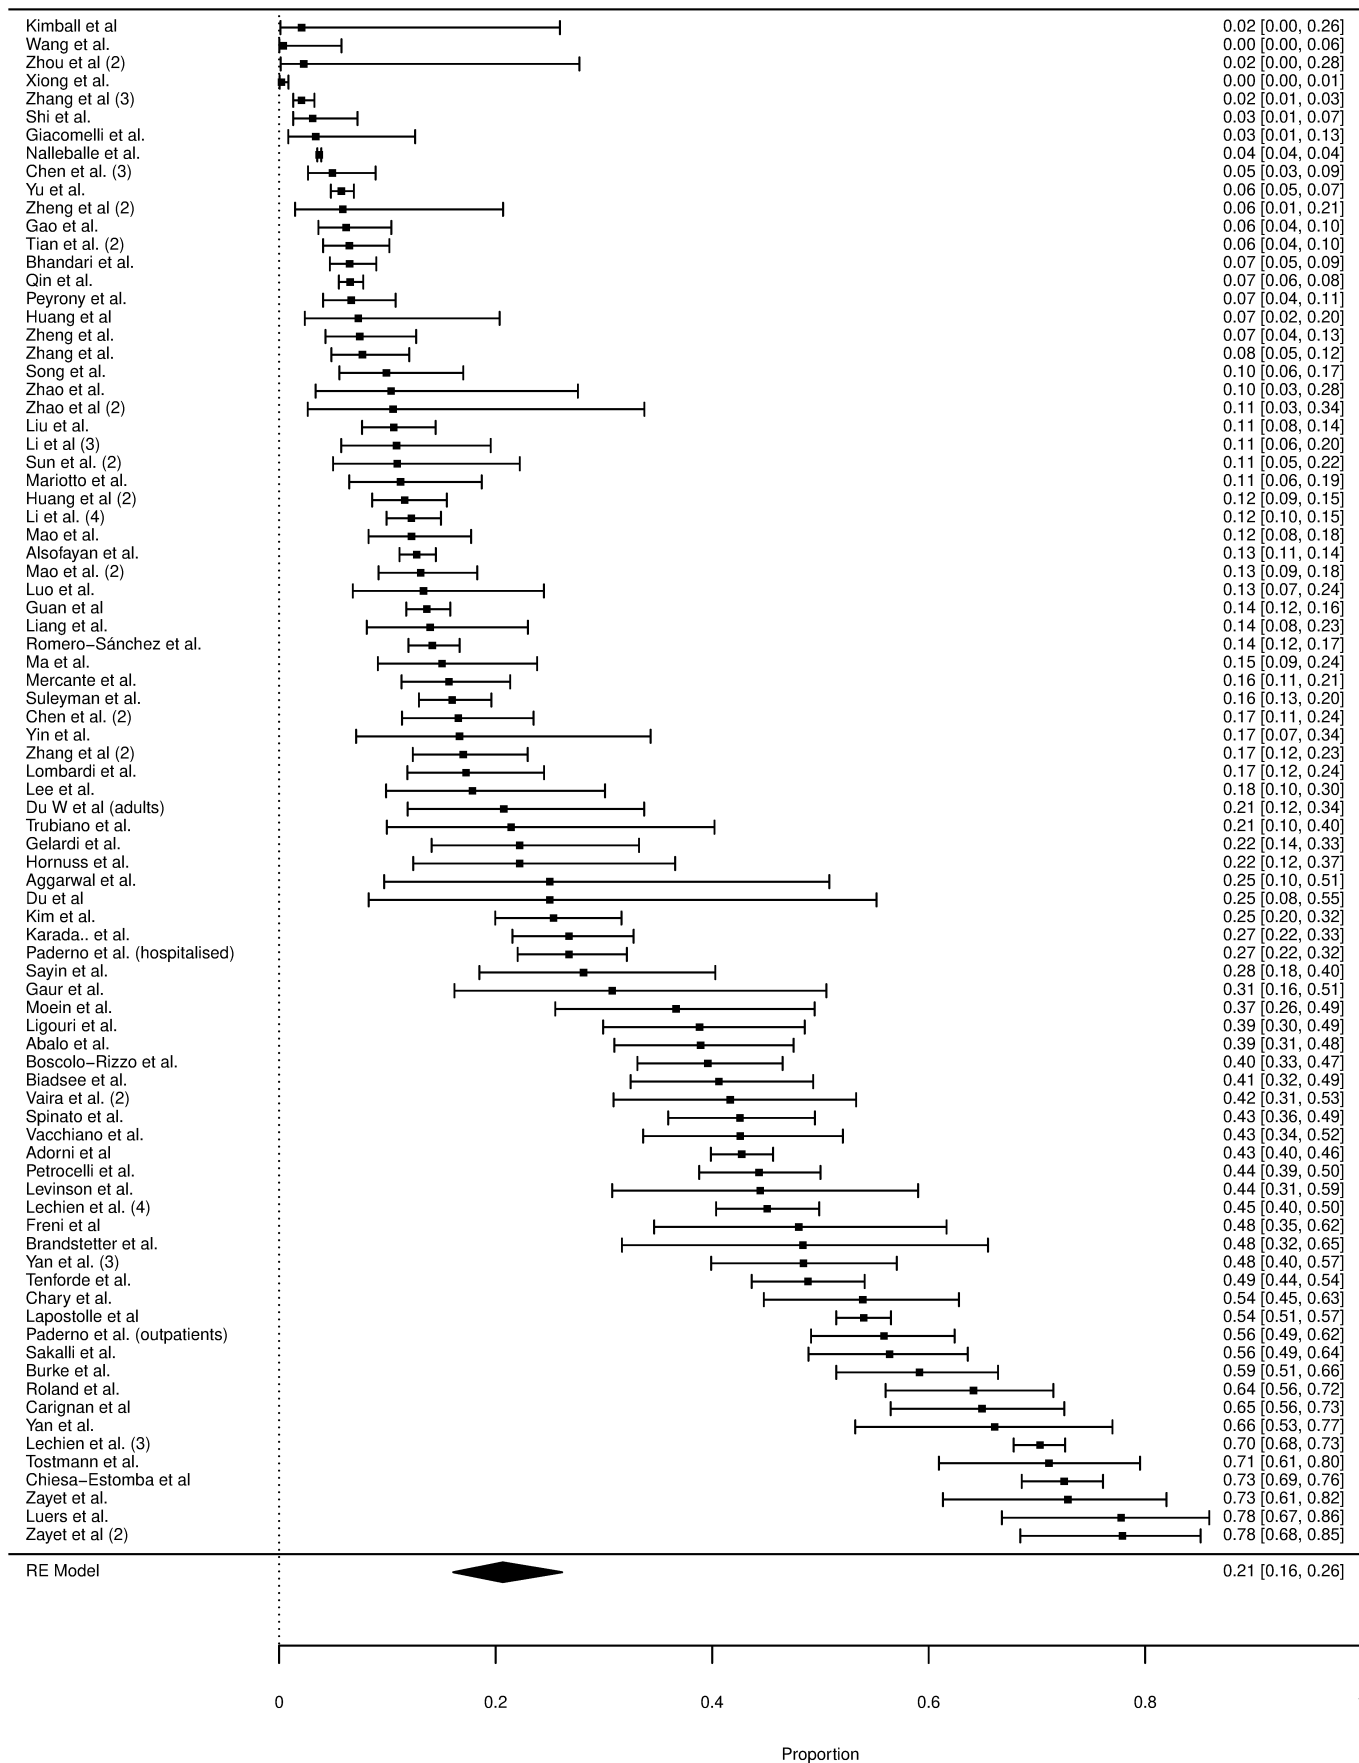

Supplement: inline-supplementary-material-6 [file inline-supplementary-material-6.pdf]
